# Supplementary material
Source: PubMed Central journal article supplement (PMC5013103)
Supplement: heartjnl-2015-308836supp_table.pdf [file heartjnl-2015-308836supp_table.pdf]

**Online Supplementary Table**

**Supplementary Table 1. Cardiac risk factor characteristics of study participants**

| Variable (at age 60-64y unless stated otherwise) | All  |           | Men |           | Women |           |
|--------------------------------------------------|------|-----------|-----|-----------|-------|-----------|
|                                                  | n    | Result    | n   | Result    | n     | Result    |
| Haemoglobin A <sub>1c</sub> , %                  | 1527 | 5.8 (0.6) | 740 | 5.8 (0.7) | 787   | 5.8 (0.6) |
| Fasting glucose, mmol/L                          | 1549 | 5.8 (1.2) | 751 | 6.0 (1.2) | 798   | 5.6 (1.2) |
| Total cholesterol, mmol/L                        | 1529 | 5.7 (1.2) | 741 | 5.3 (1.1) | 788   | 6.0 (1.2) |
| HDL <sup>§§</sup> , mmol/L                       | 1529 | 1.6 (0.4) | 741 | 1.4 (0.3) | 788   | 1.8 (0.4) |
| Triglycerides, mmol/L <sup>    </sup>            | 1529 | 1.3 (0.7) | 741 | 1.4 (0.8) | 788   | 1.2 (0.6) |
| Diabetes, n (%)                                  | 1498 | 85 (6)    | 717 | 43 (6)    | 781   | 42 (5)    |
| Smoking habit                                    |      |           |     |           |       |           |
| Current, n (%)                                   | 144  | (10)      | 74  | (10)      | 70    | (9)       |
| Ex, n (%)                                        | 621  | (41)      | 350 | (49)      | 271   | (35)      |
| Never, n (%)                                     | 733  | (49)      | 298 | (41)      | 435   | (56)      |

Data are mean (SD), <sup>||||</sup>median (interquartile range) or n (%) as appropriate. Abbreviations: <sup>§§</sup>High density lipoprotein
